# Supplementary material
Source: HighWire-hosted journal article supplement (https://jitc.bmj.com/content/9/10/e002755)

Figure S3

a

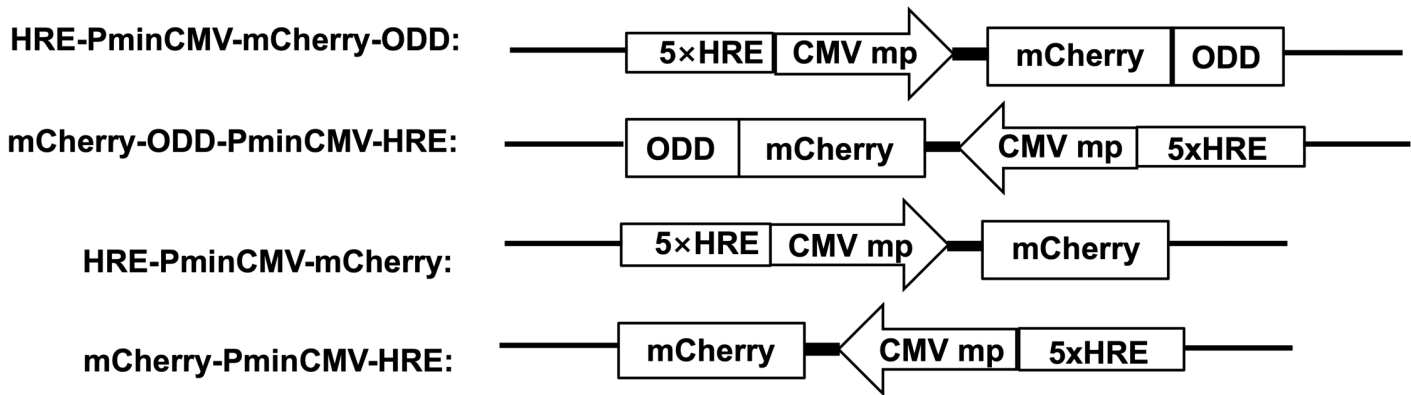

b

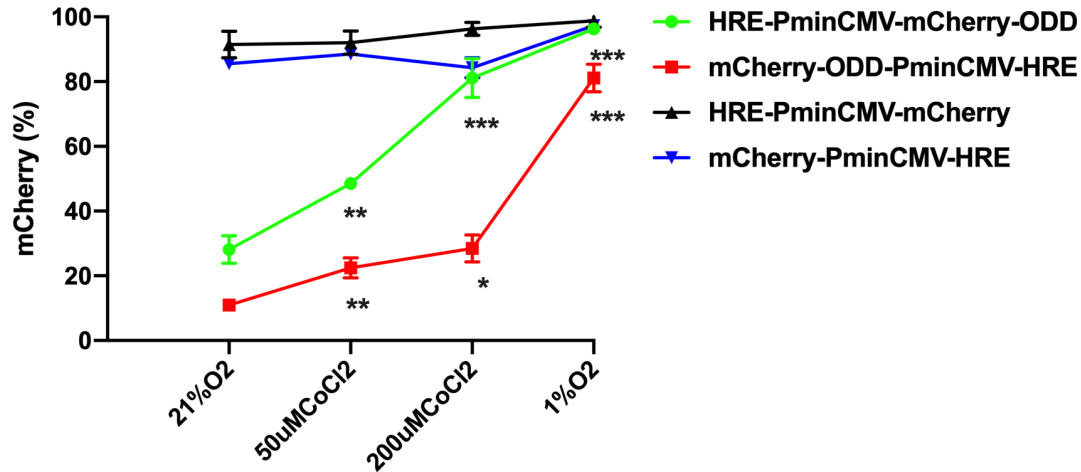

c

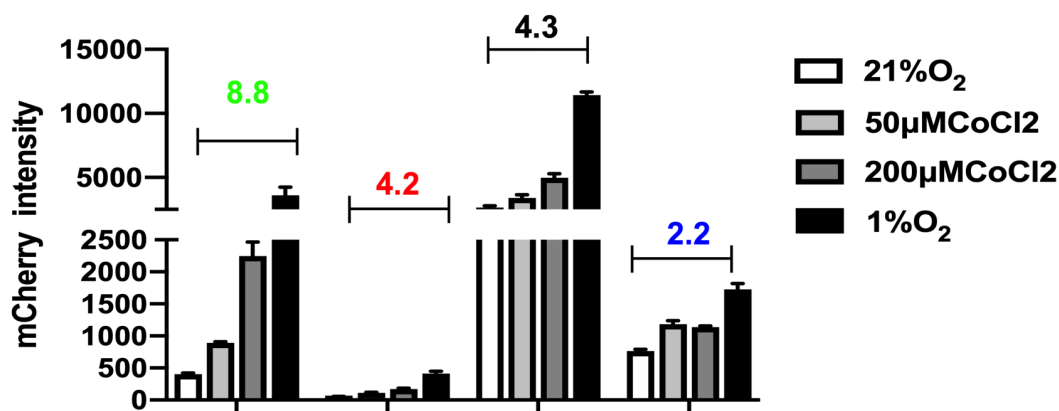

Supplement: inline-supplementary-material-3 [file inline-supplementary-material-3.pdf]
